# Supplementary material
Source: publisher site journal article supplement (https://www.dovepress.com/article/519664)
Supplement: Supplementary file 1 [file Supplemental%20e-material_2_1_1.docx]

| eTable 1: Factors Associated with Neutrophil-to-Albumin Ratio for all Patients. |
| --- |
| eFigure 1: Neutrophil-to-Albumin Ratio and Biomarkers in Predicting Pneumonia Infection |

**eTable 1 Factors Associated with Neutrophil-to-Albumin Ratio for all Patients.**

| Characteristics | Univariable | | Multivariable | |
| --- | --- | --- | --- | --- |
| OR (95% CI) | P | OR (95% CI) | P |
| Demographics |  |  |  |  |
| Age, years, mean (SD) | 1.02(1.02-1.03) | <0.001 | 1.03(1.02-1.03) | <0.001 |
| Female, n (%) | 1.11(1.02-1.22) | 0.018 | 1.17(1.06-1.29) | 0.002 |
| Smoking, n (%) |  |  |  |  |
| Current | 1.29(1.17-1.43) | <0.001 | 1.43(1.28-1.60)0 | <0.001 |
| Ever | 1.16(0.97-1.39) | 0.113 | 1.20(0.98-1.46) | 0.077 |
| Alcohol, n (%) | 1.19(1.09-1.31) | <0.001 | NA | NA |
| Medical history, n (%) |  |  |  |  |
| Hypertension | 1.04(0.95-1.14) | 0.446 | NA | NA |
| Diabetes | 1.24(1.07-1.43) | 0.004 | 1.19(1.02-1.40) | 0.030 |
| SBP | 1.01(1.00-1.01) | <0.001 | 1.00(1.00-1.00) | 0.011 |
| Hematoma characteristics |  |  |  |  |
| Infratentorial hematoma, n (%) | 0.98(0.87-1.10) | 0.708 | NA | NA |
| Size of hematoma, cm, mean (SD) | 1.01(1.01-1.01) | <0.001 | 1.00(1.00-1.00) | 0.089 |
| Intraventricular hematoma, n (%) | 1.79(1.60-2.00) | <0.001 | 1.33(1.18-1.51) | <0.001 |
| GCS score, mean (SD) | 0.84(0.83-0.85) | <0.001 | 0.87(0.86-0.88) | <0.001 |
| NAR |  |  |  |  |
| ≤0.21 | NA | NA | NA | NA |
| >0.21 | 2.95(2.68-3.24) | <0.001 | 1.99(1.79-2.21) | <0.001 |

SBP: systolic blood pressure; GCS: Glasgow Coma Scale; NA: not available

**eFigure 1 Neutrophil-to-Albumin Ratio and Biomarkers in Predicting Pneumonia Infection**

**
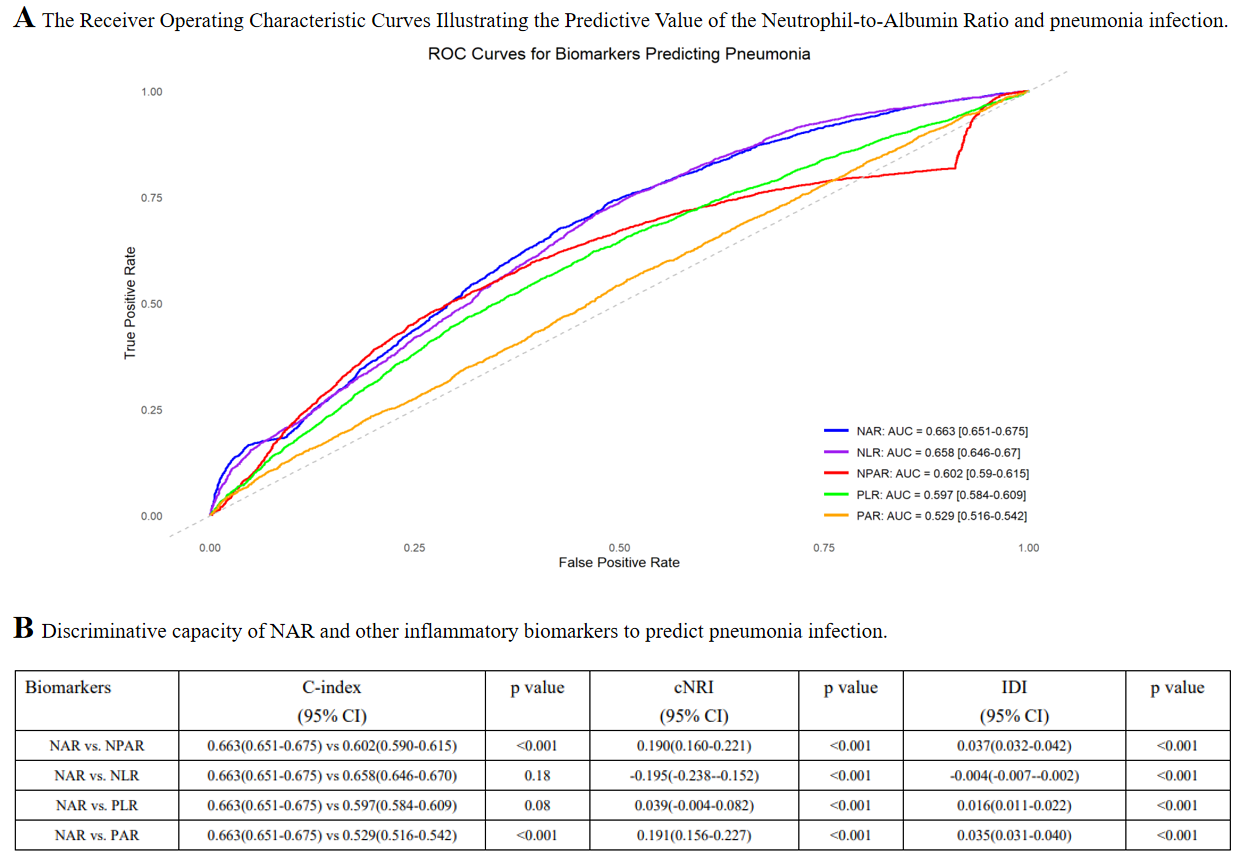
**
